# Supplementary material
Source: PubMed Central journal article supplement (PMC4702070)
Supplement: supp_115.227934_227934_suppl_figs.pdf [file supp_115.227934_227934_suppl_figs.pdf]

**The Journal of Pharmacology and Experimental Therapeutics**

**Andrographolide Ameliorates Abdominal Aortic Aneurysm Progression by Inhibiting  
Inflammatory Cell Infiltration through Downregulation of Cytokine and Integrin Expression**

Jun Ren, Zhenjie Liu, Qiwei Wang, Jasmine Giles, Jason Greenberg, Nader Sheibani, K. Craig Kent, and  
Bo Liu

Division of Vascular Surgery, Department of Surgery (J. R., Z. L., Q. W., J. G., J. G., K. K., and B. L.)  
and Department of Ophthalmology and Visual Sciences (N. S.), University of Wisconsin – Madison,  
USA. Department of Vascular Surgery (Z. L.), 2nd Affiliated Hospital School of Medicine, Zhejiang  
University, Zhejiang, China.

*Running title: Andrographolide Ameliorates Abdominal Aortic Aneurysm*

Address correspondence to:

Bo Liu, Ph. D.

Department of Surgery, University of Wisconsin Madison

1111 Highland Avenue, WIMR 5137, Madison, WI 53705

Tel: 608-263-5931, Fax: 608-262-3330

E-mail: [liub@surgery.wisc.edu](mailto:liub@surgery.wisc.edu)

## Supplemental Figures

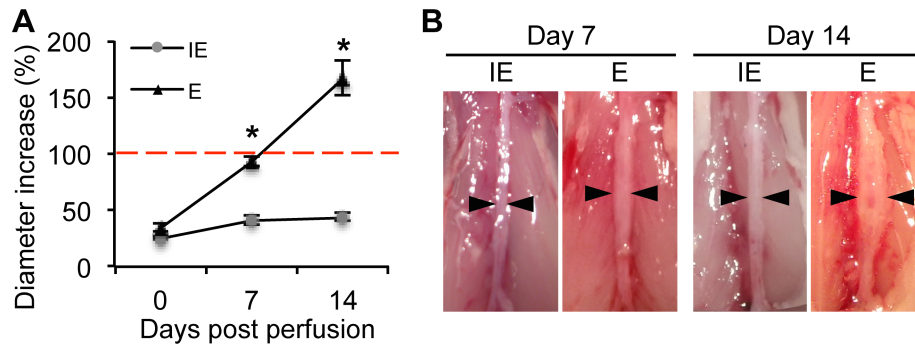

**Supplement Figure 1.** Elastase-induced mouse abdominal aortic aneurysms (AAAs). **(A)** Diameter increase of elastase (E) or inactivated elastase (IE) perfused mice abdominal aortas. An AAA is defined as a percentage increase in aortic diameter that is equal or greater than 100% (red dashed line). All values represent mean $\pm$ SEM. n=5-7; \* p<0.05, two-tailed Student's *t* test. **(B)** Representative photos and diameter increase of abdominal aortas of E- or IE- mice, taken 7 days and 14 days after surgery.

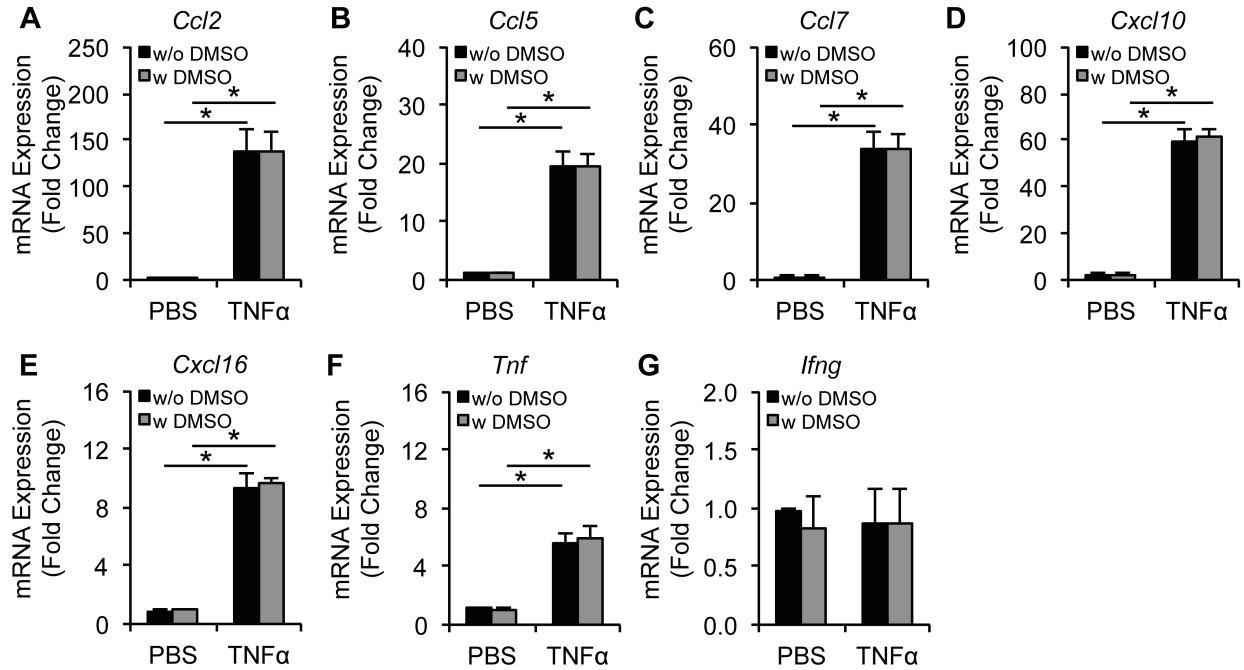

**Supplement Figure 2.** Effect of DMSO on cytokine production of SMCs. (A-G) SMCs were pretreated with or without 0.1% DMSO (the equivalent concentration of DMSO in Andro-treated culture) for 1 h before incubation with TNF $\alpha$  (10 ng/ml) for 6 h. mRNA expression of inflammatory chemokines and cytokines was analyzed by qPCR. All values represent mean $\pm$ SEM. n=3; \* p<0.05, one-way ANOVA.

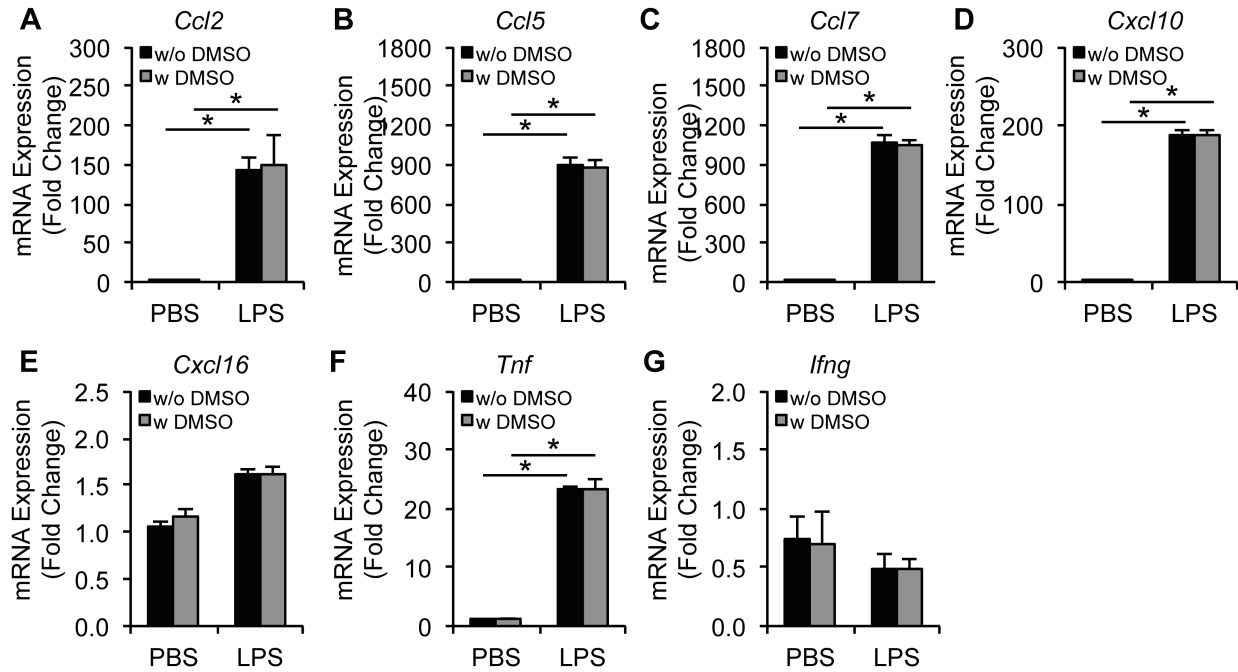

**Supplement Figure 3.** Effect of DMSO on cytokine production of monocytes/macrophages. (A-G) RAW264.7 cells were pretreated with or without 0.1% DMSO (the equivalent concentration of DMSO in Andro-treated culture) for 1 h before incubation with LPS (100 ng/ml) for 6 h. mRNA expression of inflammatory chemokines and cytokines was analyzed by qPCR. All values represent mean±SEM. n=3; \* p<0.05, one-way ANOVA.

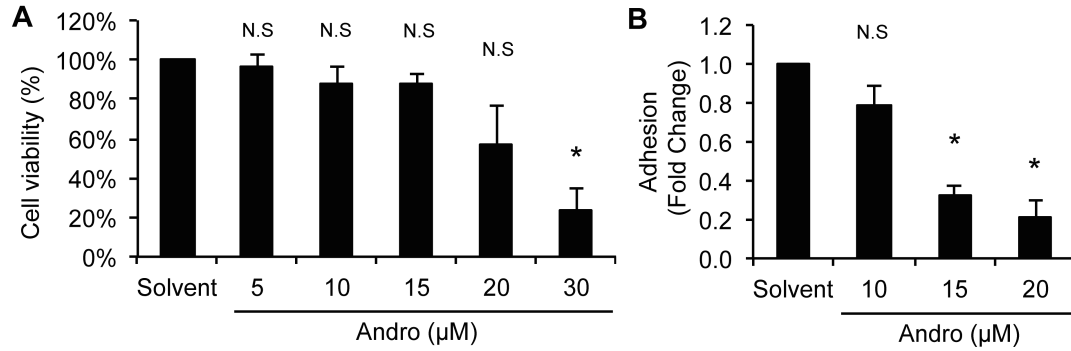

**Supplement Figure 4.** Dose-responses of Andro in monocytes/macrophages. **(A)** RAW264.7 cells were cultured in the presence of solvent (DMSO) or increasing concentration of Andro for 48h. Cell viability was measured using the CellTiter-Glo® Cell Viability Assay. Cell viability (%) was expressed as a percentage relative to solvent-treated cells. **(B)** RAW264.7 cells were pretreated with solvent (DMSO) or 10 to 20  $\mu\text{M}$  of Andro before seeding onto fibronectin-coated plates. Adherent cells were stained with crystal violet and quantified at OD550 nm. Adhesion ability was expressed as fold change to solvent-treated cells. All values represent mean $\pm$ SEM. n=3; \* p<0.05 as compared to solvent-treated cells; N.S, not significant as compared to solvent-treated cells, one-way ANOVA.

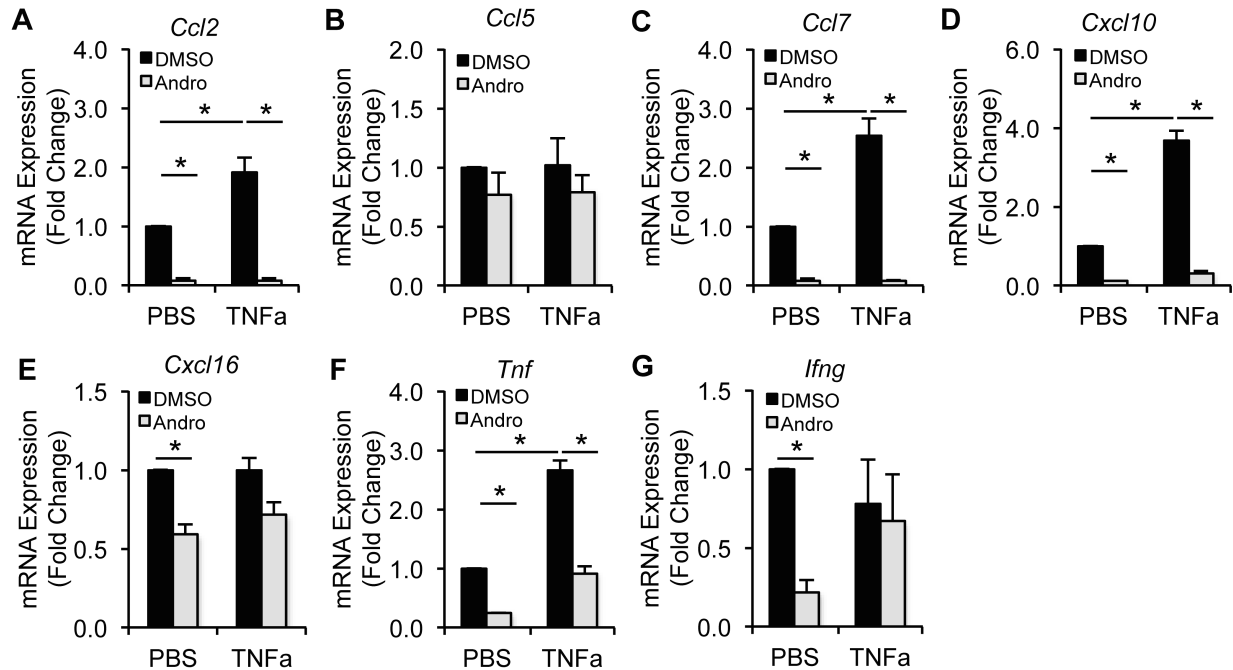

**Supplement Figure 5.** Andro inhibits cytokine expression in monocytes/macrophages. (A-G) RAW264.7 cells were pretreated with solvent (DMSO) or Andro (15 $\mu$ M) for 1 h before incubation with TNF $\alpha$  (10 ng/ml) for 6 h. mRNA expression of inflammatory chemokines and cytokines was analyzed by qPCR. All values represent mean $\pm$ SEM. n=3; \* p<0.05, one-way ANOVA (A-D&F) and two-tailed Student's *t* test (E&G).
